# Supplementary material for: Into Thick(er) Air? Oxygen Availability at Humans' Physiological Frontier on Mount Everest
Source: PubMed Central journal article supplement (PMC7756134; doi:10.1016/j.isci.2020.101718), 2020-11-20
Supplement: mmc1.pdf [file mmc1.pdf]

**iScience, Volume 23**

## **Supplemental Information**

### **Into Thick(er) Air? Oxygen Availability at Humans' Physiological Frontier on Mount Everest**

**Tom Matthews, L. Baker Perry, Timothy P. Lane, Aurora C. Elmore, Arbindra Khadka, Deepak Aryal, Dibas Shrestha, Subash Tuladhar, Saraju K. Baidya, Ananta Gajurel, Mariusz Potocki, and Paul A. Mayewski**

1

## Supplemental Information

### 2 Supplemental Figures and Tables

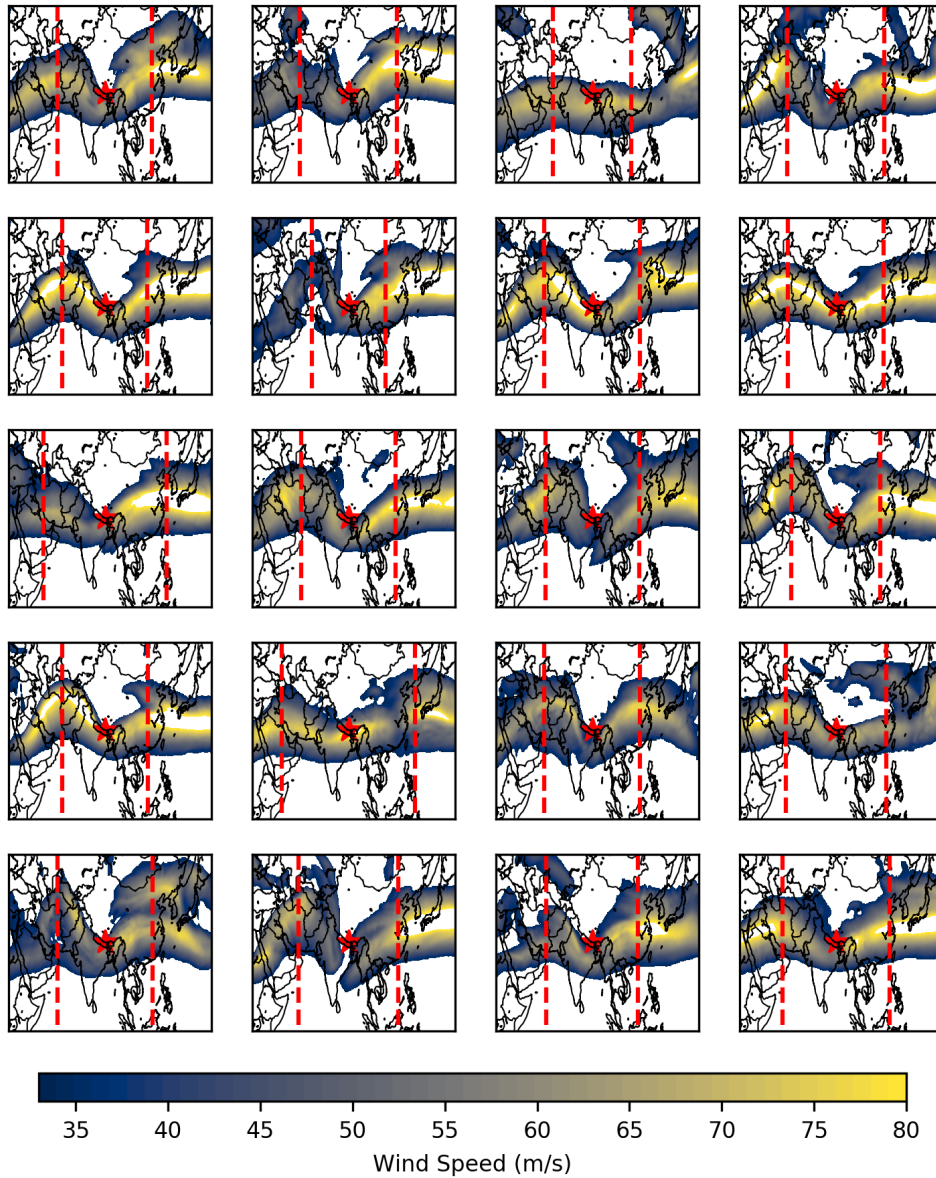

3

4 **Figure. S1: Atmospheric circulation during the 20 events of lowest air pressure on the summit**

5 **of Mount Everest**, related to Fig. 3A. Colour ramp shows the wind at the 250 hPa pressure level, and

6 the dotted red lines indicate the position of the wave crests identified by the algorithm described in the

7 Transparent Methods (Atmospheric Circulation During Low Pressure Events).

8

9

10

11

12

| Institute | Model          |
|-----------|----------------|
| IPSL      | IPSL-CM5B-LR   |
| CMCC      | CMCC-CESM      |
| MIROC     | MIROC-ESM-CHEM |
| LASG-CESS | FGOALS-g2      |
| CCCma     | CanESM2        |
| BNU       | BNU-ESM        |
| NCC       | NorESM1-M      |
| BCC       | bcc-csm1-1-m   |
| NOAA-GFDL | GFDL-CM3       |
| NOAA-GFDL | GFDL-ESM2G     |
| MRI       | MRI-CGCM3      |
| MIROC     | MIROC5         |
| MOHC      | HadGEM2-CC     |
| IPSL      | IPSL-CM5A-LR   |
| MPI-M     | MPI-ESM-MR     |
| CMCC      | CMCC-CMS       |
| MIROC     | MIROC-ESM      |
| CMCC      | CMCC-CM        |
| CSIRO-BOM | ACCESS1-0      |
| CSIRO-BOM | ACCESS1-3      |
| IPSL      | IPSL-CM5A-MR   |

13 **Table S1. CMIP5 models used in the analysis**, related to Fig 5 (C and D). Note that for each model  
14 we employed ensemble member R1i1p1 of the RCP8.5 experiment.

## 15 **Transparent Methods**

### 16 **Estimation of Mt. Everest Summit Air Pressure**

17 We use observations from the South Col (7,945 m) and Balcony (8,430 m) automatic weather stations  
18 (AWSs) deployed on the main southern (Nepalese) climbing route during the 2019 National Geographic  
19 and Rolex Perpetual Planet Everest Expedition (Matthews et al., 2020). For the South Col, hourly mean  
20 air pressure data were employed from 06:00 UTC May 22, 2019 to 06:00 UTC July 1, 2020. At the

21 Balcony, the record used is shorter (01:00 UTC May 23, 2019 to 05:00 UTC January 20, 2020), as that  
22 station stopped transmitting during the 2019/2020 winter.

23

24 To reconstruct air pressure over the longer-term, we used the ERA5 reanalysis from the European  
25 Centre for Medium Range Weather Forecasting (Hersbach et al., 2020). We extracted hourly  
26 geopotential height, air temperature and wind speed on pressure surfaces for the full period of data  
27 availability at the time of analysis (00:00 UTC on January 1, 1979 to 21:00 UTC on June 20, 2020) and  
28 then bi-linearly interpolated these data to the location of Mt. Everest's summit (27.98 °N, 86.93 °E). Air  
29 pressure was also interpolated to the location of the longer-running South Col AWS (7,945 m), where  
30 an empirical quantile mapping procedure was used to remove systematic bias (Gudmundsson et al.,  
31 2012):

32

$$33 \quad P_c = f(P_r, x, y)$$

34

Eq. 1

35 Where  $f$  is a function that interpolates to find the corrected value of the South Col reanalysis air  
36 pressure ( $P_c$ ), given the uncorrected reanalysis data ( $P_r$ ) and ordered samples  $x, y$ :

37

$$38 \quad x = g^{-1}(P_{r-cal}, q)$$

39

Eq. 2

40 and:

$$41 \quad y = g^{-1}(O, q)$$

42

Eq. 3

43 Where  $P_{r-cal}$  is the air pressure subset of reanalysis data that overlaps with the AWS observations  
44 (06:00 UTC May 22, 2019 to 21:00 UTC on June 20, 2020);  $O$  is the observed air pressure at the South  
45 Col AWS;  $q$  is vector of quantiles (0.01 to 0.99 in increments of 0.01); and  $g$  is the cumulative distribution  
46 function. Note that the interpolation was only applied to values of  $R_r$  within the range of  $P_{r-cal}$ ; values  
47 outside were adjusted with:  $P_c = P_r + \{g^{-1}(O, k) - g^{-1}(P_{r-cal}, k)\}$ , where  $k$  adopts values of 0.01 and  
48 0.99 when  $R_r$  is below and above the range of  $P_{r-cal}$ , respectively.

49

50 Air pressures were then estimated at the summit of Mt. Everest according to the hypsometric equation  
51 (Stull, 2015):

$$52 \quad P_2 = P_1 \times \exp\left(\frac{z_1 - z_2}{a \bar{T}_v}\right)$$

53 Eq. 4

54 where  $P_x$  denotes air pressure at height  $z_x$  (m),  $a$  is constant (29.3 m K<sup>-1</sup>) and  $\bar{T}_v$  is the mean virtual air  
55 temperature (K) between heights  $z_1$  and  $z_2$ .

56

57 We rewrite Eq. 4 to get the gradient in (log) air pressure as a function of elevation

$$58 \quad \left(\frac{\ln(p_2) - \ln(p_1)}{z_1 - z_2}\right) = \Delta \ln(P) / \Delta z:$$

$$59 \quad \Delta \ln(P) / \Delta z = a \bar{T}_v^{-1}$$

60 Eq. 5

61 Enabling air pressure at the summit ( $P_s$ ) to be evaluated from (corrected) air pressure at the South Col:

62

$$63 \quad P_s = P_c \times \exp\left(\frac{903}{a \bar{T}_v}\right)$$

64 Eq. 6

65 Where 903 (m) is the vertical separation between the South Col and the 8,850 m summit.

66

67 To enable application of Equation 6, it is necessary to know  $\bar{T}_v$  between the South Col and the summit,  
68 which we estimated from:

$$69 \quad \bar{T}_v = 0.5 \times (2 \times T_{col} + \Gamma \Delta z)$$

70 Eq. 7

71 where  $T_{col}$  is the ERA5 air temperature interpolated from pressure levels to the location of the South

72 Col AWS; and  $\Gamma$  is the temperature lapse rate ( $\Delta T / \Delta z$ ), obtained from the air temperature and

73 geopotential height on the 300 and 400 hPa pressure surfaces (a conservative selection intended to

74 bound the maximum pressure at the South Col and minimum pressure at the summit). Any biases in

75 the reanalysis  $\bar{T}_v$  will, however, affect our assessment of the vertical (log) pressure gradient (Eq. 7). To

76 correct for this, we used air pressures at the Balcony and South Col AWSs to estimate the hourly vertical

77 gradient in log pressure, and regressed this on concurrent  $a \bar{T}_v^{-1}$  for the overlapping period. Substitution

78 into Eq. 6 enables the summit pressure to be estimated using these empirically determined slope ( $\beta$ )  
79 and intercept ( $\alpha$ ) regression terms:

80

$$81 \quad P_s = P_c \exp\left(\frac{903}{\alpha + \beta(a \overline{T}_v)}\right)$$

82 Eq. 8

83  $P_s$  was reconstructed for the complete calendar years 1979-2019. Day of year quantities presented in  
84 the text and Fig. 2 were computed by first computing the statistic for the respective day (1-366), and  
85 then smoothing these values via convolution with a Gaussian filter set to have a standard deviation of  
86 seven days.

### 87 **Oxygen Availability and VO<sub>2</sub> max**

88 Air pressure was converted to VO<sub>2</sub> max by first calculating the partial pressure of inspired oxygen ( $P_{io}$ ):

$$89 \quad P_{io} = 0.2095 \times (P_s - 62.9)$$

90 Eq. 9

91 where 62.9 (hPa) is the saturation vapour pressure at the human body's core temperature of 37 °C, and  
92 0.2095 represents the volume fraction of oxygen in the atmosphere (Wallace and Hobbs, 1977).

93

94 We then rearranged the regression equation of Bailey (2001) (who synthesised the results of Pugh et  
95 al., 1964; Sutton et al., 1988; and West et al., 1983b) to obtain the aerobic capacity (VO<sub>2</sub> max, ml kg<sup>-1</sup>  
96 min<sup>-1</sup>) of acclimatized individuals as a function of  $P_{io}$  (in hPa):

$$97 \quad VO_2max = \frac{\ln(P_{io} \times 0.750) - 3.25}{0.0308}$$

98 Eq. 10

99 Equations 9 and 10 therefore enable changes in summit air pressure to be communicated in terms of  
100 aerobic impact -- the reduction in VO<sub>2</sub> max due to declining oxygen availability. Bailey (2001) estimate  
101 a minimum of 12.25 ml kg<sup>-1</sup> min<sup>-1</sup> (3.5 metabolic equivalent expenditures: METs) is required to safely  
102 ascend Mt. Everest, assuming summertime conditions, and that climbers are operating at around 85 %  
103 of their VO<sub>2</sub> max. Inserting this value into Eq. 10 and solving for  $P_s$  (via Eq. 9) yields a threshold air  
104 pressure of 302 hPa at the summit for Mt. Everest to be climbable without supplemental oxygen. As  
105 discussed in the Limitations (main text), we note that variation in VO<sub>2</sub> max amongst mountaineers is not

106 accounted for here, and the 302 hPa threshold we identify is representative of fit mountaineers. Some  
107 climbers (including elite climbing Sherpa; Brutsaert, 2008; Garrido et al., 1997; Gilbert-Kawai et al.,  
108 2014) will have even higher  $VO_2$  max than determined by Eq. 10, and may therefore be able to complete  
109 an oxygenless summit at air pressures below 302 hPa.

## 110 **Atmospheric Circulation During Low Pressure Events**

111 Low pressure events were defined as the 20 lowest hourly air pressure values, separated from other  
112 minima by at least two days. To explore atmospheric circulation during these events, we composited  
113 the height of the 300 hPa surface (the pressure level closest to the summit of Mt. Everest), and wind  
114 velocity at the 250 hPa surface (where the subtropical jet stream is normally located; Ren et al., 2011).  
115 Inspection of the composite (Figure 3B), and of the circulation during the individual events  
116 (Supplementary Information, Figure S1), indicated the presence of a well-defined upper-level trough  
117 with its axis centred at the longitude of Mt. Everest. For each of the 20 waves we calculated the zonal  
118 distance from Mt. Everest's summit to the well-defined ridge crest often found to the east, whose  
119 location was identified as the longitude with maximum geopotential height along 28 °N, 30-86.9 °E.  
120 Doubling this zonal distance provided an estimate of the wavelength ( $\lambda$ ) for each of the waves. The time  
121 taken for these waves to transit Mt. Everest was estimated using their phase speed ( $c$ ), calculated  
122 assuming barotropic instability, which is a reasonable approximation away from the polar front (Stull,  
123 2015):

124

$$125 \quad c = -\frac{2\Omega}{R} \cos(\theta) \times \left(\frac{\lambda}{2\pi}\right)^2 + U_{500}$$

126 Eq.11

127 where  $\Omega$  is the Earth's angular velocity ( $7.29 \times 10^{-5}$  radians  $s^{-1}$ ),  $R$  is the Earth's radius ( $6.371 \times 10^6$  m),  
128  $\theta$  is the latitude (set to 28 °N here), and  $U_{500}$  is the mean wind velocity ( $m s^{-1}$ ) at the 500 hPa level,  
129 averaged over the rectangular region 20-40 °N, 30-150 °E. The time taken for the wave trough to  
130 arrive/depart Mt. Everest was then evaluated as  $\frac{\lambda}{2c}$ . It is this time horizon which is marked with vertical  
131 red lines in Figure 3A.

## 132 **Air Pressure and Oxygen Availability During Summit Climbs**

133 The Himalayan Database (Hawley and Salisbury, 2007) provides a comprehensive history of Mt.  
134 Everest mountaineering. We used it here to identify successful climbs without supplemental oxygen  
135 over the period 1979-2019, extracting reconstructed summit air pressure for the hour that each climber  
136 reached the peak. For 19 of these 208 ascents, the exact time was not recorded, so we estimated the  
137 summit pressure at the time of ascent using a Gaussian weighted average (with a standard deviation  
138 of 3.5 h) centred at 12:00 Nepal Time (NPT) on the day of the successful climb. These choices reflect  
139 the mean and standard deviation of summit times across the 189 records that recorded this information.

## 140 **Estimates of Work Rate and Climbing Speed**

141 Estimates of maximum work rate ( $W$ ) were informed by the empirical relationship outlined by West et  
142 al. (1983b). We digitized the regression line plotted in their Fig. 2, extracting the slope ( $\beta$ ) and intercept  
143 ( $\alpha$ ) coefficients to enable conversion between quantities.:

144

$$145 \quad W = \beta \times VO_2max + \alpha$$

146

Eq. 12

147 The value of  $\beta$  and  $\alpha$  were, respectively, determined to be 41.54 kg<sup>2</sup> m ml<sup>-1</sup>, and -255.96 kg m min<sup>-1</sup>.  
148 Before applying Eq. 12, we reduced each VO<sub>2</sub> max by 15 % to acknowledge that mountaineers likely  
149 climb at 85 % of their VO<sub>2</sub> max (Bailey, 2001).  $W$  is in units of kg m min<sup>-1</sup>, and the speed of vertical ascent  
150 (m min<sup>-1</sup>) can be isolated if the mass (kg) of the mountaineer is prescribed. Following West et al.  
151 (1983b), we set the mass of the hypothetical climber (including equipment) to 100 kg. Note that because  
152  $W$  is a function of VO<sub>2</sub>, work rates and climbing speeds should be interpreted as representative of fit  
153 mountaineers, but not necessarily elite climbing Sherpa (see Limitations in main text).

## 154 **The Impact of Climate Change on Summit Pressure**

155 To summarise changes in summit pressure over the period of ERA5 reconstruction (1979-2019), we  
156 computed the monthly minimum, mean, and maximum summit pressures. Rates of change were then  
157 summarised for these quantities using the Theil-Sen slope estimation method (Sen, 1960; Theil, 1950).  
158 The respective trends were termed *significant* if zero lay outside the 95 % confidence interval of the  
159 slope estimate.



160

161 We used daily mean pressure level CMIP5 output from 21 models forced by the RCP8.5 experiment  
162 (Taylor et al., 2011) to determine the sensitivity of Mt. Everest summit air pressure to global mean  
163 warming. For each model (listed in Table S1) the same interpolation method applied to the ERA5  
164 reanalysis data to estimate summit pressure was employed. We also extracted the respective near-  
165 surface global mean air temperature ( $T_g$ ) simulated by the corresponding model.

166

167 The sensitivity of Mt. Everest summit pressure to changes in  $T_g$  was then evaluated using the change  
168 factor approach (Osborn et al., 2016). Briefly, this comprised (i) estimating the modelled sensitivity of  
169 summit pressures to changes in global mean temperature; (ii) multiplying this sensitivity by a prescribed  
170 temperature perturbation; and (iii) adding this result to air pressures in the baseline climate. We  
171 achieved (i) by first smoothing CMIP5  $P_s$  and  $T_g$  with a running 30-year mean filter, and then regressing  
172  $P_s$  upon  $T_g$ . Regressions were performed on a seasonal basis, assessing the sensitivity of the (30-year  
173 mean) monthly minimum, maximum, and mean summit pressures to climate warming. The results from  
174 this analysis were a 21-member ensemble of regression slope coefficients indicating the sensitivity  
175 ( $\beta_{month}^{stat}$ , hPa °C<sup>-1</sup>) to statistic  $^{stat}$  (minimum, maximum or mean) in the respective  $month$ . The monthly  
176 stratification of the regression coefficients was warranted because for mean and minimum summit  
177 pressure, a single factor ANOVA indicated significant differences across months ( $p < 0.01$ ). Evidence  
178 for different sensitivities of maximum summit pressure across months was weaker ( $p = 0.13$ ), but we  
179 kept the monthly stratification to be consistent across statistics.

180

181 For each model, steps (ii) and (iii) were achieved by transforming the sensitivities ( $\beta_{month}^{stat}$ ) to absolute  
182 values of air pressure ( $\widehat{P_{smonth}^{stat}}$ ) given prescribed changes ( $\Delta$ ) to  $T_g$  through:

183

$$\widehat{P_{smonth}^{stat}} = \beta_{month}^{stat} \Delta T_g + P_{smonth}^{stat}$$

184

Eq. 13

185 where  $P_{smonth}^{stat}$  is the 1981-2010 statistic for the respective month in the ERA5 reconstructed summit air  
186 pressure series. The median, 5<sup>th</sup>, and 95<sup>th</sup> percentiles of  $\beta_{month}^{stat}$  across the model simulations were used  
187 to indicate, respectively, the central estimate and uncertainty in application of Eq. 13. Annual means,  
188 minima and maxima were then evaluated for the respective climates by calculating the relevant statistic  
189 from these transformed series. We characterized departures from the 1981-2010 global mean air

190 temperature using the HadCRUT4 dataset (Morice et al., 2012). Note that according to these data, this  
191 period was 0.60 °C warmer than preindustrial, defined here as 1850-1879.

## 192 **Supplemental References**

- 193 Gudmundsson, L., Bremnes, J.B., Haugen, J.E., Engen-Skaugen, T., 2012. Technical Note:  
194 Downscaling RCM precipitation to the station scale using statistical transformations – a  
195 comparison of methods. *Hydrol. Earth Syst. Sci.* 16, 3383–3390. [https://doi.org/10.5194/hess-](https://doi.org/10.5194/hess-16-3383-2012)  
196 [16-3383-2012](https://doi.org/10.5194/hess-16-3383-2012)
- 197 Hawley, E., and R. Salisbury. “The Himalayan Database: The Expedition Archives of Elizabeth  
198 Hawley,” 2007. <https://www.himalayandatabase.com/>.
- 199 Osborn, T.J., Wallace, C.J., Harris, I.C., Melvin, T.M., 2016. Pattern scaling using ClimGen: monthly-  
200 resolution future climate scenarios including changes in the variability of precipitation. *Clim.*  
201 *Change* 134, 353–369. <https://doi.org/10.1007/s10584-015-1509-9>
- 202 Ren, X., Yang, X., Zhou, T., Fang, J., 2011. Diagnostic comparison of wintertime East Asian  
203 subtropical jet and polar-front jet: Large-scale characteristics and transient eddy activities.  
204 *Acta Meteorol Sin* 25, 21–33. <https://doi.org/10.1007/s13351-011-0002-2>
- 205 Sen, P.K., 1960. On Some Convergence Properties of U-Statistics. *Calcutta Statistical Association*  
206 *Bulletin* 10, 1–18. <https://doi.org/10.1177/0008068319600101>
- 207 Theil, H., 1950. A Rank-Invariant Method of Linear and Polynomial Regression Analysis. *Koninklijke*  
208 *Nederlandse Akademie van Wetenschappen Proceedings* 53, 386–392. (Part 1), 521–525  
209 (Part 2), 1397–1412 (Part 3).
- 210 Wallace, J.M., Hobbs, P.V., 1977. *Atmospheric Science: An Introductory Survey*. Academic Press,  
211 New York.
- 212 West, J.B., Lahiri, S., Maret, K.H., Peters, R.M., Pizzo, C.J., 1983b. Barometric pressures at extreme  
213 altitudes on Mt. Everest: physiological significance. *J Appl. Physiol. Respir. Environ. Exerc.*  
214 *Physiol.* 54, 1188–1194. <https://doi.org/10.1152/jappl.1983.54.5.1188>  
215  
216
